# Supplementary material for: Optimization of Growth Conditions for Chlorpyrifos-Degrading Bacteria in Farm Soils in Nakuru County, Kenya
Source: Biomed Res Int. 2024 Jan 25;2024:1611871. doi: 10.1155/2024/1611871 (PMC10834098; doi:10.1155/2024/1611871)
Supplement: Supplementary Materials — Tables with data on optical density for bacterial growth and CP degradation have been submitted as supplementary material (Tables S1, S2, and S3). [file 1611871.f1.docx]

**Optimization of Growth Conditions for Chlorpyrifos Degrading Bacteria in Farm Soils in Nakuru County, Kenya**

**Authors:** MIRIAM WEPUKHULU12#, PETER WACHIRA1, NDERITU HURIA1, PAUL SIFUNA3, SULIMAN ESSUMAN3, MICAH ASAMBA4

**Supplementary material**

**Supplementary table S1: Effect of pH on growth of bacteria and CP degradation**

Note: Values are presented as for three replicates. Means with dissimilar superscript lower-case alphabets within the same row are significantly different (P<0.05; One-Way ANOVA with Turkey’s *post hoc* test); Whereas means with dissimilar subscript uppercase alphabets within the same isolate and day are significantly different (P<0.05; paired student t-test statistic).

| **DAYS** | **λ (nm)** | **ISOLATES** | | | | | | | | | | | | | | | | | | | | |
| --- | --- | --- | --- | --- | --- | --- | --- | --- | --- | --- | --- | --- | --- | --- | --- | --- | --- | --- | --- | --- | --- | --- |
| **PH5MW1** | **PH 5MW2** | **PH 5MW3** | **PH 5MW4** | **PH 5MW5** | **PH 5MW6** | **PH 5MW7** | **PH 7MW1** | **PH 7MW2** | **PH 7MW3** | **PH 7MW4** | **PH 7MW5** | **PH 7MW6** | **PH 7MW7** | **PH 9MW1** | **PH 9MW2** | **PH 9MW3** | **PH 9MW4** | **PH 9MW5** | **PH 9MW6** | **PH9MW7** |
| **DAY 1** | **600** | 0.0943±0.00277bcdeA | 0.0951±0.00751bcdA | 0.0814±0.000404cdefA | 0.1175±0.0037abcA | 0.0708±0.00294cdefgA | 0.08495±0.00118cdefA | 0.0812±0.00404cdefA | 0.0617±0.0186defgA | 0.11805±0.000144abcA | 0.14555±0.00476abA | 0.1384±0.0322abA | 0.07855±0.00101cdefA | 0.1511±0.000346aA | 0.0334±0.000577fgA | 0.11585±0.00557abcB | 0.0834±0.00167cdefA | 0.04735±0.00419defgA | 0.0391±0.019fgA | 0.04275±0.00303efgA | 0.0789±0.00404cdefA | 0.02125±0.00101gA |
| **480** | 0.00265±0.00026bB | 0.0176±0.000115bB | 0.0185±0.000635bB | 0.0224±0.00162bB | 0.0204±0.00121bB | 0.01055±0.00217bB | 0.01445±0.00118bB | 0.0009±0.000115bB | 0.0115±0.00393bB | 0.00675±0.00113bB | 0.011±0.00052bB | 0.0127±0.000808bB | 0.01175±0.00188bB | 0.0223±0.00699bB | 0.1487±0.0712aA | 0.00905±0.000375bB | 0.0126±0.00606bB | 0.00455±0.00026bB | 0.00315±0.000722bB | 0.00085±0.000087bB | 0.00295±0.00107bB |
| **DAY 5** | **600** | 0.3998±0.0475aA | 0.351±0.00606abcA | 0.3206±0.0444abcdeA | 0.334±0.00115abcdA | 0.3456±0.00808abcB | 0.3578±0.031abA | 0.3004±0.041abcdeA | 0.2369±0.00693bcdefA | 0.2138±0.0401cdefA | 0.1964±0.00831efA | 0.22±0.0136cdefA | 0.24735±0.00436bcdefA | 0.3047±0.0394abcdeA | 0.2407±0.0246bcdefA | 0.1968±0.00895defA | 0.224±0.013bcdefA | 0.20025±0.00667defA | 0.1938±0.00133efA | 0.16085±0.00696fA | 0.2077±0.0378defA | 0.2061±0.0291defA |
| **480** | 0.2123±0.0163bB | 0.21903±0.00852bB | 0.18378±0.00797bB | 0.18348±0.00849bB | 0.597±0.232aA | 0.18553±0.00153bB | 0.16658±0.00242bB | 0.10015±0.00476bB | 0.0845±0.00052bB | 0.07815±0.00159bB | 0.07715±0.000433bB | 0.0804±0.00289bB | 0.0862±0.0112bB | 0.056155±0.000436bB | 0.11912±0.00268bB | 0.14471±0.000557bB | 0.13488±0.00473bB | 0.13778±0.00283bB | 0.13753±0.00274bB | 0.13303±0.00447bB | 0.11598±0.00266bB |
| **DAY 9** | **600** | 0.562±0.0336abA | 0.5616±0.00953abA | 0.5329±0.0141abcA | 0.43195±0.000029abcdefA | 0.4787±0.0304abcdA | 0.5943±0.0626aA | 0.4739±0.026abcdA | 0.372±0.0221bcdefA | 0.25625±0.00707efA | 0.2506±0.00826efA | 0.29805±0.00621defA | 0.5579±0.0292abA | 0.2408±0.0254fA | 0.3309±0.0153cdefA | 0.323±0.0246defA | 0.3098±0.00485defA | 0.2487±0.00797efA | 0.25055±0.000491efA | 0.448±0.14abcdeA | 0.27655±0.008defA | 0.2361±0.0107fA |
| **480** | 0.17915±0.00234bB | 0.1549±0.00208bcB | 0.1422±0.0165bcdB | 0.9025±0.0612aB | 0.1202±0.00964bcdefB | 0.1281±0.0127bcdeB | 0.1265±0.014bcdefB | 0.1179±0.0115bcdefB | 0.1228±0.00231bcdefB | 0.10745±0.000318bcdefB | 0.1053±0.00127bcdefB | 0.1078±0.0154bcdefB | 0.0677±0.0159defB | 0.0913±0.00266cdefB | 0.08220±0.015cdefB | 0.044100.00231fB | 0.064100.0062defB | 0.0670±0.015defB | 0.10040bcdefB | 0.042800.008fB | 0.048300.002efB |
| **DAY 13** | **600** | 0.5927±0.0139aA | 0.57665±0.00909abA | 0.5544±0.0241abA | 0.4879±0.00508bcA | 0.49145±0.00938abA | 0.505±0.0116abA | 0.4891±0.0423bcA | 0.3859±0.0187cdA | 0.31055±0.00447defghA | 0.3449±0.00652defA | 0.332±0.00121defgA | 0.377±0.0428dA | 0.2161±0.0214hA | 0.3219±0.00427defgA | 0.38085±0.0073dA | 0.3499±0.00595deA | 0.3253±0.0097defgA | 0.23635±0.00932ghA | 0.2445±0.00889fghA | 0.3227±0.0135defgA | 0.2611±0.04efghA |
| **480** | 0.2313±0.0163abB | 0.2045±0.0166abcdB | 0.2166±0.00964abcB | 0.1891±0.00167abcdB | 0.1798±0.01abcdB | 0.1825±0.0167abcdB | 0.1844±0.0193abcdB | 0.1289±0.0259bcdB | 0.18475±0.00251abcdB | 0.1802±0.00473abcdB | 0.2075±0.00167abcdB | 0.1625±0.0231abcdB | 0.16785±0.00228abcdA | 0.18135±0.0032abcdB | 0.09515±0.0039cdB | 0.1183±0.0106bcdB | 0.1101±0.0102bcdB | 0.08525±0.00788dB | 0.0822±0.00618dB | 0.2783±0.0962aB | 0.0844±0.0162dB |
| **DAY 17** | **600** | 0.5845±0.0505aA | 0.503±0.0109abA | 0.489±0.00981abA | 0.4212±0.0105bcdeA | 0.4369±0.0152abcdA | 0.4456±0.0349abcdA | 0.4667±0.0429abcA | 0.3225±0.0117cdefA | 0.2489±0.00364fghA | 0.2552±0.00346fghA | 0.26345±0.000029fghA | 0.3524±0.0568bcdefA | 0.1651±0.0255ghA | 0.3013±0.00312defgA | 0.2496±0.0747fghA | 0.1644±0.0026ghA | 0.2774±0.0161efghA | 0.25175±0.00141fghA | 0.3079±0.0151defgA | 0.2346±0.00548fghA | 0.1298±0.0224hA |
| **480** | 0.3235±0.0149aB | 0.3234±0.0314aB | 0.3043±0.0156abB | 0.245±0.0136bB | 0.249500.008abB | 0.156800.018cdeB | 0.2542±0.000231abB | 0.1136±0.0169cdefB | 0.134±0.0166cdefB | 0.157±0.00162cdeB | 0.16855±0.00257cB | 0.1611±0.0282cdB | 0.08345±0.00534efB | 0.12575±0.00147cdefB | 0.0783±0.0137fB | 0.06835±0.00361fB | 0.0883±0.0166defB | 0.12065±0.00517cdefB | 0.1061±0.013cdefB | 0.11905±0.00956cdefB | 0.0766±0.0163fB |
| **DAY 21** | **600** | 0.6647±0.0254abA | 0.62395±0.00494abA | 0.59625±0.00892bA | 0.51815±0.00586bcA | 0.5366±0.0216bcA | 0.535±0.028bcA | 0.7716±0.0428aA | 0.3264±0.0398defA | 0.2938±0.00358defA | 0.28915±0.0088defA | 0.34625±0.00713defA | 0.4269±0.0939cdA | 0.2078±0.0203fA | 0.27425±0.00257defA | 0.3462±0.00387defA | 0.3922±0.00237cdeA | 0.32415±0.00898defA | 0.2145±0.00335fA | 0.21005±0.00788fA | 0.2543±0.0604efA | 0.2141±0.0348fA |
| **480** | 0.2834±0.00999bB | 0.5498940.008aB | 0.2658±0.0229bB | 0.2131±0.0122bB | 0.2424±0.0141bB | 0.22095±0.0043bB | 0.2273±0.0316bB | 0.1414±0.0192bB | 0.1336±0.00589bB | 0.1553±0.0105bB | 0.17955±0.000664bB | 0.1954±0.0323bB | 0.0943±0.0135bB | 0.1525±0.0132bB | 0.1496±0.00548bB | 0.1264±0.00704bB | 0.10445±0.00684bB | 0.089±0.00647bB | 0.0801±0.00491bB | 0.1177±0.0374bB | 0.0808±0.0105bB |

**Supplementary table S2: Effect of Temperature on growth of bacteria and CP degradation**

Note: Values are presented as for three replicates. Means with dissimilar superscript lower-case alphabets within the same row are significantly different (P<0.05; One-Way ANOVA with Turkey’s *post hoc* test); Whereas means with dissimilar subscript uppercase alphabets within the same isolate and day are significantly different (P<0.05; paired student t-test statistic).

| **DAYS** | **λ (nm)** | **ISOLATES** | | | | | | | | | | | | | | | | | | | | |
| --- | --- | --- | --- | --- | --- | --- | --- | --- | --- | --- | --- | --- | --- | --- | --- | --- | --- | --- | --- | --- | --- | --- |
| **25°CMW1** | **25°C MW2** | **25°C MW3** | **25°C MW4** | **25°C MW5** | **25°C MW6** | **25°C MW7** | **30°C MW1** | **30°C MW2** | **30°C MW3** | **30°C MW4** | **30°C MW5** | **30°C MW6** | **30°C MW7** | **37°C MW1** | **37°C MW2** | **37°C MW3** | **37°C MW4** | **37°C MW5** | **37°C MW6** | **37°C MW7** |
| **DAY 1** | **600** | 0.0402±0.00641bcA | 0.0917±0.00606bc­A | 0.1108±0.046bcA | 0.1512±0.0417abcA | 0.38±0.18aA | 0.1146±0.00693bcA | 0.05205±0.00199bcA | 0.0617±0.0186bcA | 0.11805±0.000144bcA | 0.14555±0.00476bcA | 0.1384±0.0322bcA | 0.07855±0.00101bcA | 0.1511±0.000346abcA | 0.0334±0.000577cA | 0.2708±0.0329abA | 0.1372±0.00219bcA | 0.1399±0.0208bcA | 0.1491±0.0106abcA | 0.18175±0.0088abcA | 0.14615±0.00315abcA | 0.125±0.0131bcA |
| **480** | 0.02185±0.000029bcdB | 0.0192±0.00329bcdeB | 0.0092±0.00185cdefB | 0.0423±0.003aB | 0.0394±0.000808aB | 0.0195±0.000693bcdeB | 0.0088±0.00185defB | 0.0009±0.000115fB | 0.0115±0.00393bcdefB | 0.00675±0.00113efA | 0.011±0.00052bcdefB | 0.0127±0.000808bcdefB | 0.01175±0.00188bcdefB | 0.0223±0.00699bcdB | 0.04755±0.00286aB | 0.02105±0.00263bcdB | 0.01905±0.00113bcdeB | 0.0214±0.00352bcdB | 0.01825±0.00182bcdeB | 0.02285±0.00211bcB | 0.0242±0.00121bB |
| **DAY 5** | **600** | 0.1792±0.0477aA | 0.15605±0.00828aA | 0.2284±0.0349aA | 0.2955±0.0294aA | 0.2287±0.00548aA | 0.17645±0.00927aA | 0.24305±0.00113aA | 0.2369±0.00693aA | 0.2138±0.0401aA | 0.1964±0.00831aA | 0.22±0.0136aA | 0.24735±0.00436aA | 0.3047±0.0394aA | 0.2407±0.0246aA | 0.2211±0.0376aA | 0.185±0.0143aA | 0.1832±0.00762aA | 0.2551±0.0664aA | 0.19935±0.00124aA | 0.2506±0.0589aA | 0.2324±0.0225aA |
| **480** | 0.0647±0.00306bcdB | 0.0618±0.00052bcdeB | 0.07585±0.0032abcB | 0.0852±0.000115abcB | 0.0821±0.0041abcB | 0.0669±0.00185bcdB | 0.0587±0.000173bcdeB | 0.10015±0.00476aB | 0.0845±0.00052abcB | 0.07815±0.00159abcB | 0.07715±0.000433abcB | 0.0804±0.00289abcB | 0.0862±0.0112abB | 0.056155±0.000436cdeB | 0.04555±0.00263defB | 0.0221±0.00456fB | 0.0664±0.00346bcdB | 0.0582±0.00231bcdeB | 0.0414±0.0182defB | 0.033±0.00127efB | 0.04405±0.00817defB |
| **DAY 9** | **600** | 0.30895±0.00263bcdefA | 0.25775±0.00245cdefA | 0.2555±0.026cdefA | 0.31875±0.00499bcdeA | 0.2903±0.0129bcdefA | 0.2984±0.00329bcdefA | 0.23028±0.00299efA | 0.372±0.0221bA | 0.25625±0.00707cdefA | 0.2506±0.00826cdefA | 0.29805±0.00621bcdefA | 0.5579±0.0292aA | 0.2408±0.0254defA | 0.3309±0.0153bcdA | 0.603±0.0441aA | 0.339±0.0286bcA | 0.2584±0.00543cdefA | 0.2441±0.0221cdefA | 0.30915±0.0017bcdefA | 0.2164±0.00115fA | 0.22675±0.00817efA |
| **480** | 0.0883±0.0162bcdeB | 0.1222±0.00387abB | 0.12±0.00658abB | 0.1453±0.00242aB | 0.1453±0.00242aB | 0.1183±0.0176abB | 0.06535±0.00517deB | 0.1179±0.0115abB | 0.1228±0.00231abB | 0.10745±0.000318abcdB | 0.1053±0.00127abcdB | 0.1078±0.0154abcdB | 0.0677±0.0159cdeB | 0.0913±0.00266bcdeB | 0.112600.008abB | 0.05170±0.008eB | 0.09110±0.0145bcdeB | 0.08210±0.0115bcdeB | 0.11460±0.0105abB | 0.10890±0.0015abcB | 0.1085±0.00231abcB |
| **DAY 13** | **600** | 0.3945±0.0566bcdeA | 0.3851±0.0648bcdeA | 0.4089±0.0588bcdeA | 0.5711±0.0124aA | 0.4662±0.0514abcA | 0.5007±0.00572abA | 0.50315±0.000202abA | 0.3859±0.0187bcdeA | 0.31055±0.00447cdefgA | 0.3449±0.00652bcdefgA | 0.332±0.00121cdefgA | 0.377±0.0428bcdefA | 0.2161±0.0214fgA | 0.3219±0.00427cdefgA | 0.4383±0.0167abcdA | 0.213±0.0344gA | 0.2842±0.0164defgA | 0.3045±0.0243defgA | 0.36275±0.00395bcdefgA | 0.39275±0.00286bcdeA | 0.25385±0.00632efgA |
| **480** | 0.1105±0.0171bcdefB | 0.11105±0.00026bcdefB | 0.1017±0.011cdefB | 0.1185±0.00133bcdefB | 0.1179±0.0146bcdefB | 0.0845±0.00751efB | 0.1456±0.000173abcdefB | 0.1289±0.0259abcdefB | 0.18475±0.00251abB | 0.1802±0.00473abcB | 0.2075±0.00167aB | 0.1625±0.0231abcdeB | 0.16785±0.00228abcdB | 0.18135±0.0032abcB | 0.1383±0.013abcdefB | 0.0826±0.0177efB | 0.10795±0.0013bcdefB | 0.1082±0.0157bcdefB | 0.11605±0.00707bcdefB | 0.0897±0.0349defB | 0.0796±0.0276fB |
| **DAY 17** | **600** | 0.2844±0.0713abcA | 0.32535±0.000779abcA | 0.2975±0.0277abcA | 0.42915±0.00176aA | 0.219±0.107bcA | 0.3505±0.00318abcA | 0.3593±0.0227abcA | 0.3225±0.0117abcA | 0.2489±0.00364abcA | 0.2552±0.00346abcA | 0.26345±0.000029abcA | 0.3524±0.0568abcA | 0.1651±0.0255cA | 0.3013±0.00312abcA | 0.29995±0.00979abcA | 0.1757±0.0273cA | 0.4173±0.000808abA | 0.2228±0.0168bcA | 0.2701±0.00589abcA | 0.3321±0.000693abcA | 0.3025±0.0752abcA |
| **480** | 0.1356±0.0357aB | 0.0996±0.0359aB | 0.1628±0.00889aB | 0.10675±0.00251aB | 0.1686±0.00502aB | 0.1013±0.0378aB | 0.1655±0.0156aB | 0.1136±0.0169aB | 0.134±0.0166aB | 0.157±0.00162aB | 0.16855±0.00257aB | 0.1611±0.0282aB | 0.08345±0.00534aB | 0.12575±0.00147aB | 0.12975±0.00644aB | 0.0802±0.0136aB | 0.0982±0.00733aB | 0.1042±0.0108aB | 0.11505±0.00245aB | 0.12645±0.00286aB | 0.08805±0.00268aB |
| **DAY 21** | **600** | 0.4734±0.0813abcA | 0.47795±0.00759abA | 0.4304±0.0489abcdefA | 0.53325±0.00921aA | 0.4685±0.0277abcdA | 0.5301±0.00404aA | 0.4579±0.0233abcdeA | 0.3264±0.0398bcdefgA | 0.2938±0.00358cdefgA | 0.28915±0.0088defgA | 0.34625±0.00713bcdefgA | 0.4269±0.0939abcdefA | 0.2078±0.0203gA | 0.27425±0.00257fgA | 0.46555±0.00222abcdA | 0.2581±0.0421fgA | 0.2974±0.0244bcdefgA | 0.3419±0.024bcdefgA | 0.35935±0.00136abcdefgA | 0.37665±0.00494abcdefgA | 0.2788±0.000924efgA |
| **480** | 0.162±0.0397abcdB | 0.1589±0.00595abcdB | 0.2075±0.014abcB | 0.2111±0.00843abB | 0.2308±0.0139aB | 0.1739±0.0167abcdB | 0.127±0.0593abcdB | 0.1414±0.0192abcdB | 0.1336±0.00589abcdB | 0.1553±0.0105abcdB | 0.17955±0.000664abcdB | 0.1954±0.0323abcdB | 0.0943±0.0135dB | 0.1525±0.0132abcdB | 0.16295±0.00921abcdB | 0.0877±0.0166dB | 0.1262±0.0132abcdB | 0.1403±0.017abcdB | 0.1313±0.00843abcdB | 0.103±0.00375bcdB | 0.0996±0.01cdB |

**Supplementary Table S3: Concentration**

Note: Values are presented as for three replicates. Means with dissimilar superscript lower-case alphabets within the same row are significantly different (P<0.05; One-Way ANOVA with Turkey’s *post hoc* test); Whereas means with dissimilar subscript uppercase alphabets within the same isolate and day are significantly different (P<0.05; paired student t-test statistic).

| **DAYS** | **λ** | **ISOLATES** | | | | | | | | | | | | | | | | | | | | |
| --- | --- | --- | --- | --- | --- | --- | --- | --- | --- | --- | --- | --- | --- | --- | --- | --- | --- | --- | --- | --- | --- | --- |
| **25ppmMW1** | **25ppmMW2** | **25ppmMW3** | **25ppmMW4** | **25ppmMW5** | **25ppmMW6** | **25ppmMW7** | **50ppmMW1** | **50ppmMW2** | **50ppmMW3** | **50ppmMW4** | **50ppmMW5** | **50ppmMW6** | **50ppmMW7** | **100ppmMW1** | **100ppmMW2** | **100ppmMW3** | **100ppmMW4** | **100ppmMW5** | **100ppmMW6** | **100ppmMW7** |
| **DAY 1** | **λ=600 nm** | 0.19095±0.00401abcdA | 0.1954±0.00196abcdA | 0.1867±0.00479bcdA | 0.1476±0.00277defA | 0.1558±0.00312cdefA | 0.17525±0.00701cdeA | 0.10825±0.000664fghA | 0.1615±0.00958cdefA | 0.2503±0.0135aA | 0.2161±0.0221abcA | 0.1416±0.0101defA | 0.24255±0.0095abA | 0.1618±0.0148cdefA | 0.1394±0.0111defgA | 0.0617±0.0186hiA | 0.11805±0.000144efghA | 0.14555±0.00476defA | 0.1384±0.0322defgA | 0.07855±0.00101ghiA | 0.1511±0.000346defA | 0.0334±0.000577iA |
| **λ=480 nm** | 0.09095±0.00401aA | 0.0953±0.00191aB | 0.0882±0.00566abB | 0.0476±0.00277deA | 0.0558±0.00312cdB | 0.07225±0.00528bcB | 0.07005±0.000779cB | 0.00845±0.00268ijB | 0.0071±0.00208ijA | 0.0429±0.00473defB | 0.03485±0.0024efgB | 0.03735±0.00309efgB | 0.02945±0.00141fghB | 0.00425±0.000606jB | 0.0009±0.000115jA | 0.0115±0.00393ijB | 0.00675±0.00113ijB | 0.011±0.00052ijA | 0.0127±0.000808hijB | 0.01175±0.00188ijB | 0.0223±0.00699ghiA |
| **DAY 5** | **λ=600 nm** | 0.1105±0.0129eA | 0.1601±0.0298cdeA | 0.1563±0.0484cdeA | 0.2415±0.0108bcA | 0.2326±0.0137bcdeA | 0.2104±0.0218bcdeA | 0.1733±0.0161cdeA | 0.3681±0.0424aA | 0.1178±0.016deA | 0.2015±0.0149bcdeA | 0.204±0.011bcdeA | 0.2375±0.00225bcdA | 0.20795±0.00701bcdeA | 0.2441±0.000231bcA | 0.2369±0.00693bcdA | 0.2138±0.0401bcdeA | 0.1964±0.00831bcdeA | 0.22±0.0136bcdeA | 0.24735±0.00436abcA | 0.3047±0.0394abA | 0.2407±0.0246bcdA |
| **λ=480 nm** | 0.01565±0.00026iB | 0.04525±0.0028fghB | 0.0242±0.00133iB | 0.03375±0.000953ghiB | 0.0481±0.00115fgB | 0.02015±0.000144iB | 0.0279±0.00519hiB | 0.15635±0.000318aB | 0.1124±0.00156bcA | 0.127±0.0041bB | 0.1178±0.00121bcB | 0.12015±0.00367bB | 0.11555±0.000491bcB | 0.1217±0.00566bB | 0.10015±0.00476cdB | 0.0845±0.00052deB | 0.07815±0.00159eB | 0.07715±0.000433eB | 0.0804±0.00289eB | 0.0862±0.0112deB | 0.056155±0.000436fB |
| **DAY 9** | **λ=600 nm** | 0.34425±0.0039defghA | 0.3412±0.0178defghA | 0.4139±0.00883cdA | 0.5131±0.0105abA | 0.29675±0.00234ghijA | 0.30475±0.00436fghijA | 0.285±0.00687hijkA | 0.5001±0.0302abA | 0.21605±0.00471kA | 0.4441±0.0162bcA | 0.2864±0.0112hijkA | 0.3967±0.00635cdeA | 0.376±0.00468cdefA | 0.33395±0.00938efghiA | 0.372±0.0221cdefgA | 0.25625±0.00707ijkA | 0.2506±0.00826jkA | 0.29805±0.00621fghijA | 0.5579±0.0292aA | 0.2408±0.0254jkA | 0.3309±0.0153efghiA |
| **λ=480 nm** | 0.0841±0.00883bB | 0.1112±0.0239abB | 0.07475±0.000722bB | 0.10305±0.00834abB | 0.09115±0.00165abB | 0.1149±0.0326abB | 0.07645±0.00251bB | 0.08080±0.00251bB | 0.08970±0.00251abB | 0.0690±0.00251bB | 0.07960±0.00251bB | 0.12350±0.00251abB | 0.14590±0.00251aB | 0.07380±0.00251bB | 0.1179±0.0115abB | 0.1228±0.00231abB | 0.10745±0.000318abB | 0.1053±0.00127abB | 0.1078±0.0154abB | 0.0677±0.0159bB | 0.0913±0.00266abB |
| **DAY 13** | **λ=600 nm** | 0.5533±0.0901aA | 0.5401±0.0376abA | 0.4361±0.00537abcdefA | 0.45195±0.0099abcdefA | 0.4395±0.0119abcdefA | 0.4098±0.015bcdefA | 0.4154±0.012abcdefA | 0.52585±0.00338abcA | 0.4729±0.0266abcdeA | 0.5129±0.0125abcdA | 0.4001±0.0128bcdefA | 0.493±0.0237abcdA | 0.4985±0.0174abcdA | 0.429±0.00878abcdefA | 0.3859±0.0187cdefA | 0.31055±0.00447fgA | 0.3449±0.00652efgA | 0.332±0.00121efgA | 0.377±0.0428defA | 0.2161±0.0214gA | 0.3219±0.00427fgA |
| **λ=480 nm** | 0.152±0.0236bcdB | 0.1774±0.0189abcdB | 0.1514±0.00167bcdB | 0.1799±0.00699abcdB | 0.2049±0.00866abB | 0.2265±0.0117aB | 0.2002±0.0112abcB | 0.13935±0.00153cdB | 0.16425±0.00915abcdB | 0.17155±0.00395abcdB | 0.13385±0.00471dB | 0.18785±0.00915abcdB | 0.185±0.0119abcdB | 0.18485±0.000202abcdB | 0.1289±0.0259dB | 0.18475±0.00251abcdB | 0.1802±0.00473abcdB | 0.2075±0.00167abB | 0.1625±0.0231bcdB | 0.16785±0.00228abcdB | 0.18135±0.0032abcdB |
| **DAY 17** | **λ=600 nm** | 0.4557±0.0231abcdA | 0.4736±0.0223abcdA | 0.4059±0.0162abcdefA | 0.50525±0.00499abA | 0.397±0.00479bcdefA | 0.4757±0.0121abcA | 0.40705±0.00453abcdefA | 0.4496±0.0292abcdeA | 0.373±0.0329cdefghA | 0.4595±0.0369abcdA | 0.3797±0.0262bcdefgA | 0.5328±0.014aA | 0.4613±0.0457abcdA | 0.3446±0.0185defghA | 0.3225±0.0117efghA | 0.2489±0.00364hiA | 0.2552±0.00346ghiA | 0.26345±0.000029ghiA | 0.3524±0.0568cdefghA | 0.1651±0.0255iA | 0.3013±0.00312fghA |
| **λ=480 nm** | 0.1815±0.0185abcdeB | 0.1976±0.0111abcdB | 0.20105±0.0065abcdB | 0.1919±0.00052abcdB | 0.2468±0.00883aB | 0.2344±0.015abB | 0.19775±0.00447abcdB | 0.18245±0.00725abcdeB | 0.2578±0.0134aB | 0.18225±0.00424abcdeB | 0.2091±0.0294abcB | 0.1862±0.0176abcdeB | 0.1842±0.0187abcdeB | 0.1915±0.0186abcdB | 0.1136±0.0169efB | 0.134±0.0166cdefB | 0.157±0.00162cdefB | 0.16855±0.00257bcdeB | 0.1611±0.0282bcdeB | 0.08345±0.00534fB | 0.12575±0.00147defB |
| **DAY 21** | **λ=600 nm** | 0.5916±0.0978abA | 0.46665±0.0039abcdefA | 0.5179±0.0815abcdeA | 0.4254±0.0194bcdefgA | 0.4926±0.0334abcdefA | 0.403±0.0111bcdefgA | 0.38675±0.00026bcdefgA | 0.6124±0.0501abA | 0.5763±0.0816abcA | 0.5545±0.00121abcdA | 0.49115±0.00188abcdefA | 0.5981±0.041abA | 0.701±0.0256aA | 0.4757±0.019abcdefA | 0.3264±0.0398defgA | 0.2938±0.00358efgA | 0.28915±0.0088efgA | 0.34625±0.00713cdefgA | 0.4269±0.0939bcdefgA | 0.2078±0.0203gA | 0.27425±0.00257fgA |
| **λ=480 nm** | 0.2127±0.0165abcdB | 0.2036±0.00393abcdB | 0.1731±0.014abcdeB | 0.2363±0.0329abB | 0.2141±0.00393abcdB | 0.1892±0.00779abcdB | 0.1758±0.0147abcdeB | 0.1937±0.00624abcdB | 0.1783±0.0204abcdeB | 0.2464±0.0229aB | 0.1951±0.00104abcdB | 0.2264±0.0115abcB | 0.2083±0.0346abcdB | 0.2056±0.00352abcdB | 0.1414±0.0192cdeB | 0.1336±0.00589deB | 0.1553±0.0105abcdeB | 0.17955±0.000664abcdeB | 0.1954±0.0323abcdB | 0.0943±0.0135eB | 0.1525±0.0132bcdeB |
